# Supplementary material for: Photoluminescent sensor for acetylcholinesterase inhibitor determination
Source: Royal Society of Chemistry journal article supplement (doi:10.1039/c4tb01239a), 2014-08-12
Supplement: c4tb01239a1.pdf [file c4tb01239a1.pdf]

## Supporting information

### Photoluminescent Sensor for Acetylcholinesterase Inhibitor Determination

Muhammad Saleem<sup>a</sup>, Luke P. Lee<sup>b</sup>, Ki Hwan Lee<sup>a,\*</sup>

<sup>a</sup>Department of Chemistry, Kongju National University, Gongju, Chungnam 314-701, Republic of Korea

<sup>b</sup>Departments of Bioengineering, Electrical Engineering and Computer Science, and Biophysics Program, University of California, Berkeley, California 94720, USA

\*corresponding author. Fax: +82-41-856-8613; E-mail address: khlee@kongju.ac.kr

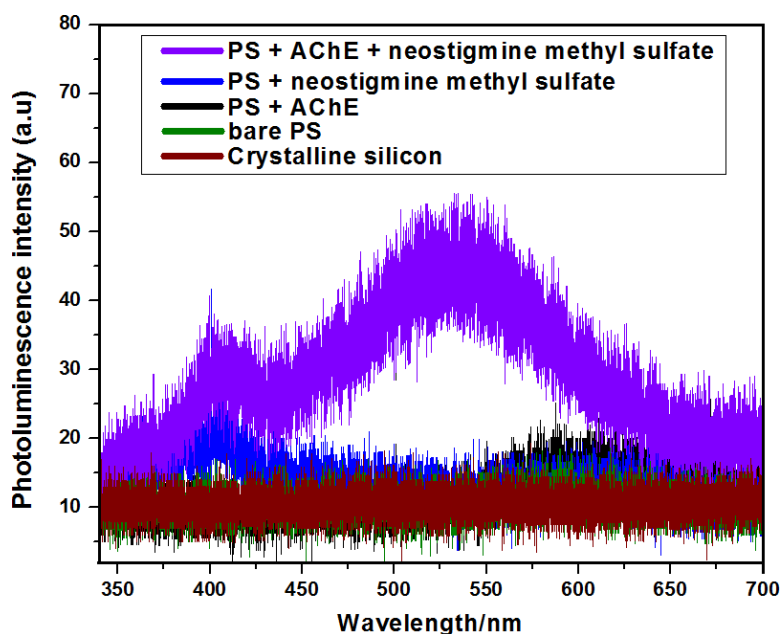

Fig. S1. Photoluminescence spectra of crystalline silicon surface; bare porous silicon surface; acetylcholinesterase immobilized porous silicon surface; bare porous silicon surface on incubation with neostigmine methyl sulfate and acetylcholinesterase immobilized porous silicon surface after incubation with standard acetylcholinesterase inhibitors *i. e.*, neostigmine methyl sulfate.
